# Supplementary material
Source: PubMed Central journal article supplement (PMC1142580)
Supplement: 7600647s1.pdf [file 7600647s1.pdf]

# Sup. 1

## A

VE-cadwt  
inducible CSKwt

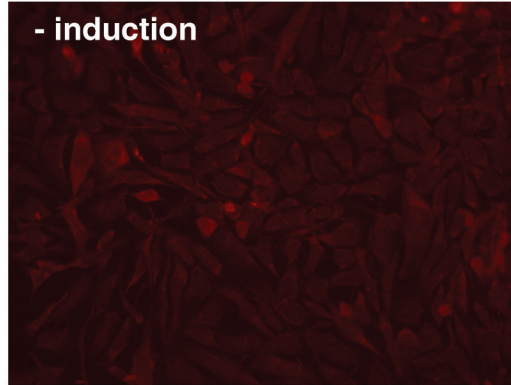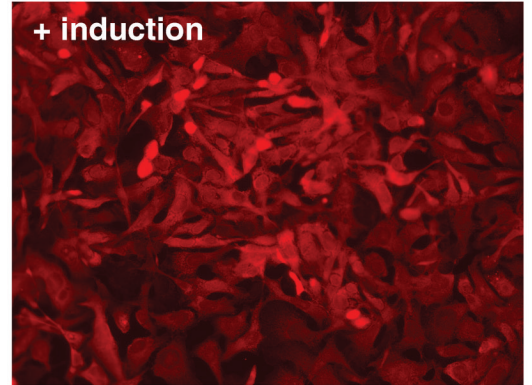

VE-cadY685F  
inducible CSKwt

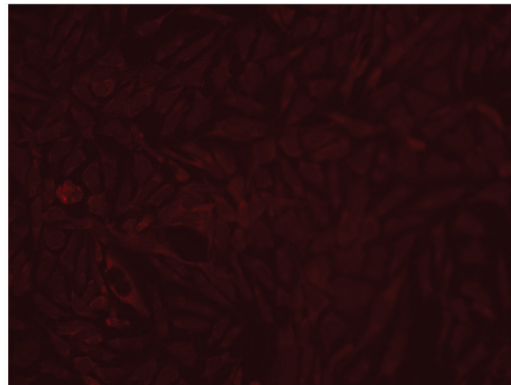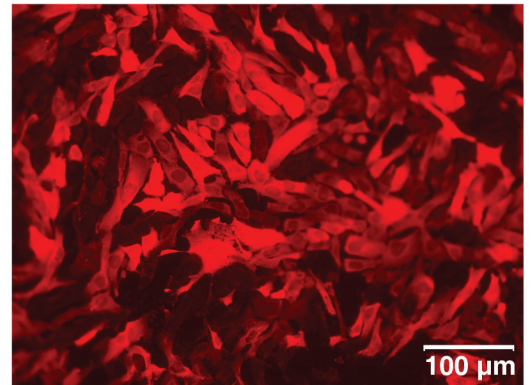

## B

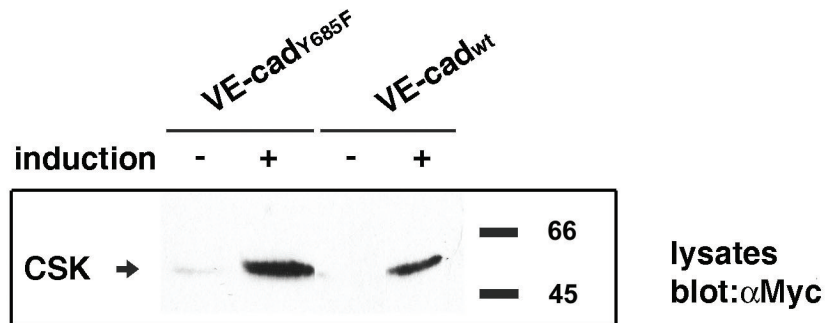

**Suppl Fig.1: Comparison of expression levels of Csk in two different CHO transfectants.**

CHO cells expressing inducible Csk and either wt VE-cadherin or the VE-cadherin-Y685F mutant were analysed by indirect immunofluorescence **(A)** or by immunoblot **(B)** using antibody 9E10 against myc. Induction of cells (as indicated) was done in each case for 10 h and equal numbers of cells were analysed in immunoblots. Note that Csk was slightly stronger expressed in cells co-expressing the mutant form of VE-cadherin.
