# Supplementary material
Source: PubMed Central journal article supplement (PMC1142580)
Supplement: 7600647s2.pdf [file 7600647s2.pdf]

Sup.2

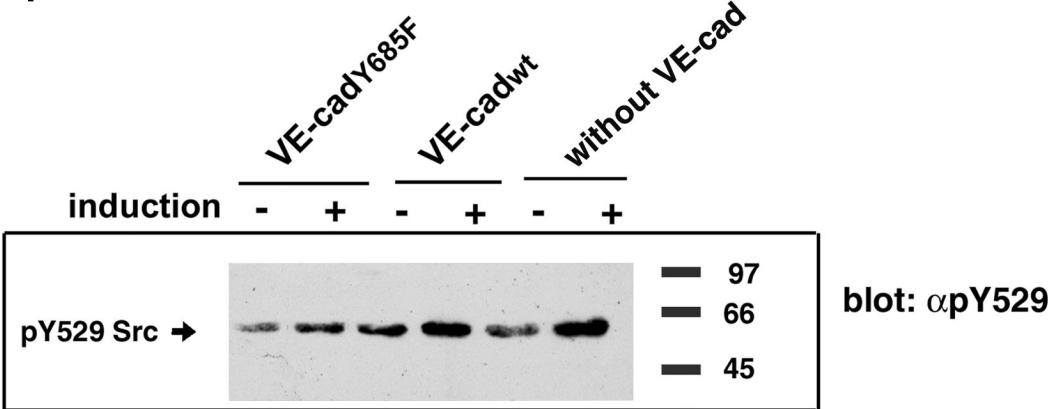

**Suppl Fig. 2: Phosphorylation of Src at the inactivating tyrosine 529 in cell lysates by Csk**

Double transfected CHO cells expressing either mtVE-cadherin Y685F (VE-cad-Y685F), or wt-VE-cadherin (VE-cad-wt) or no VE-cadherin (without VE-cad) were either induced (+) or non-induced(-) for expression of Csk and cell lysates with identical protein content were subsequently analysed by immunoblotting with mAb anti-Src [Y529] (BioSource, Camarillo,CA) that specifically recognizes phosphorylation of tyrosine 529. Csk is known to inactivate Src by phosphorylating this tyrosine.
